# Supplementary material
Source: PubMed Central journal article supplement (PMC5845780)
Supplement: NIHMS894933-supplement-supplement_1.pdf [file NIHMS894933-supplement-supplement_1.pdf]

# Supplemental Figure E8 – Funnel plots and Egger's test for small-study effects

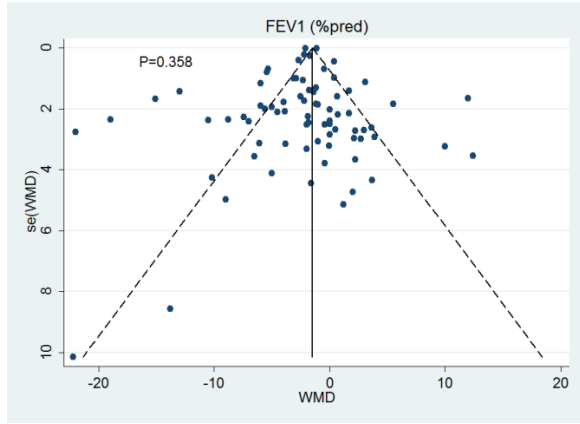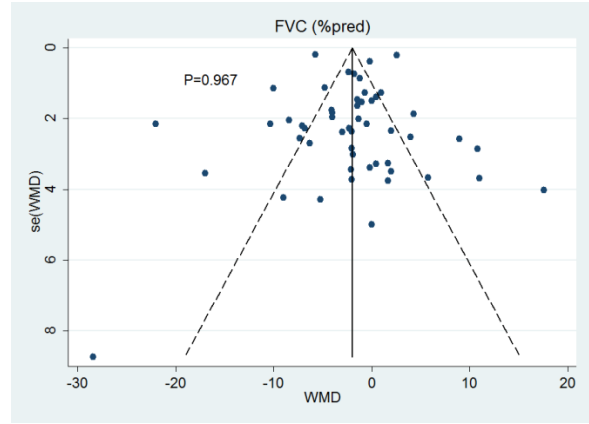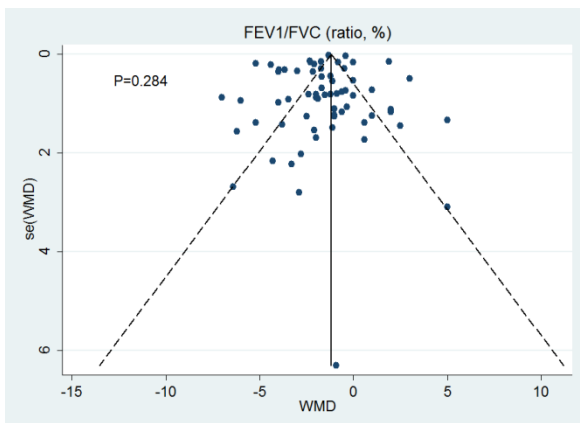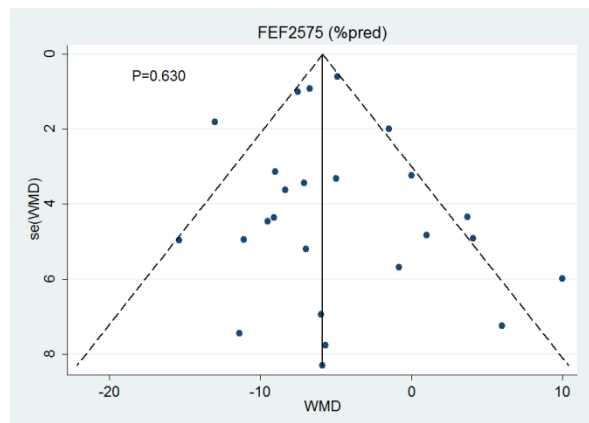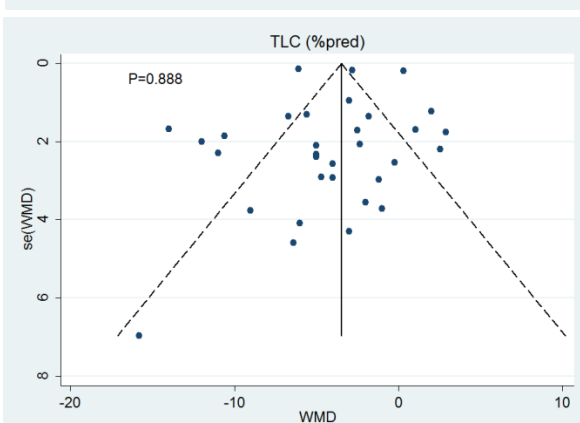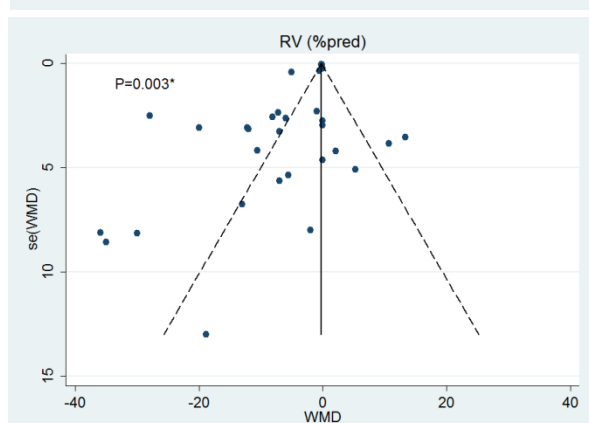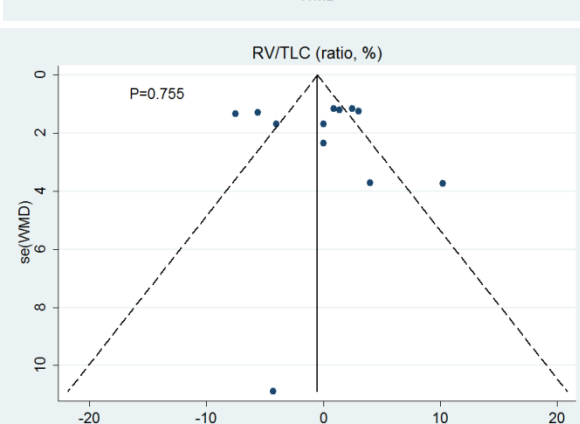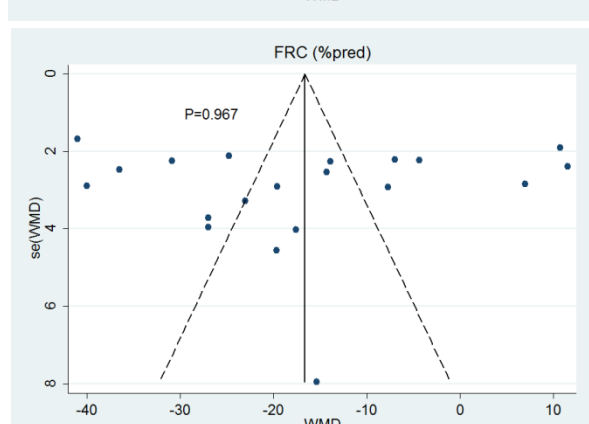

## Supplemental Figure E9 – Effect modification of obesity on lung function by age and gender

A. FEV<sub>1</sub> (%pred) by gender in adults

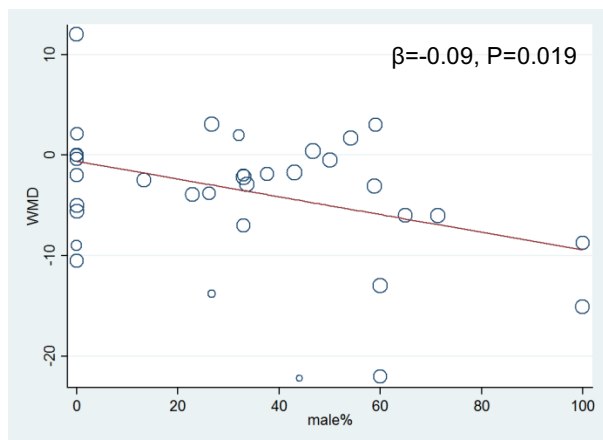

B. FEV<sub>1</sub>/FVC (%) by gender in asthmatics

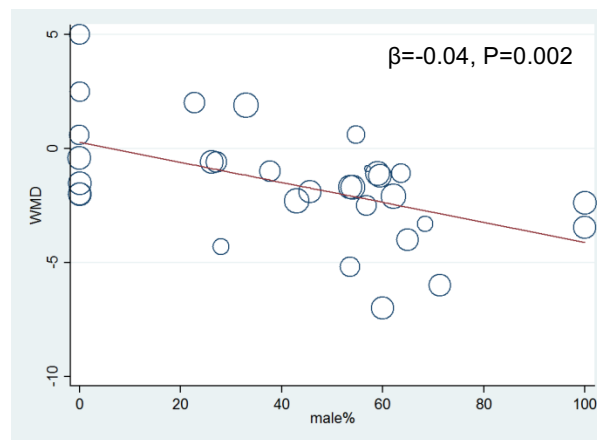

C. FVC (%pred) by age in children and adults

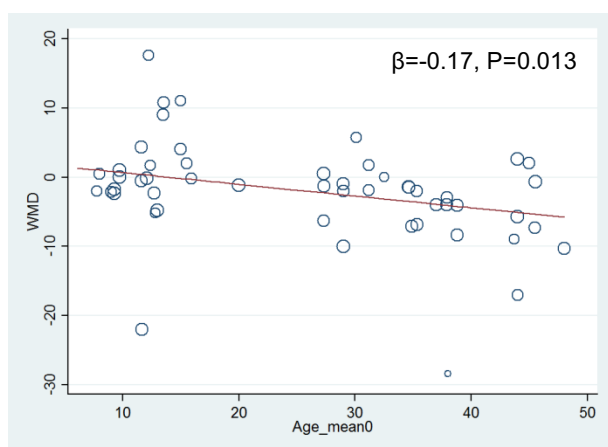

D. FEV<sub>1</sub>/FVC (%) by age in children and adults

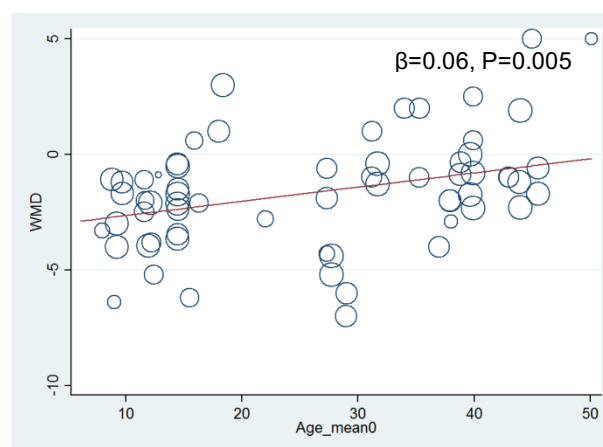

E. TLC (%pred) by age in non-asthmatics

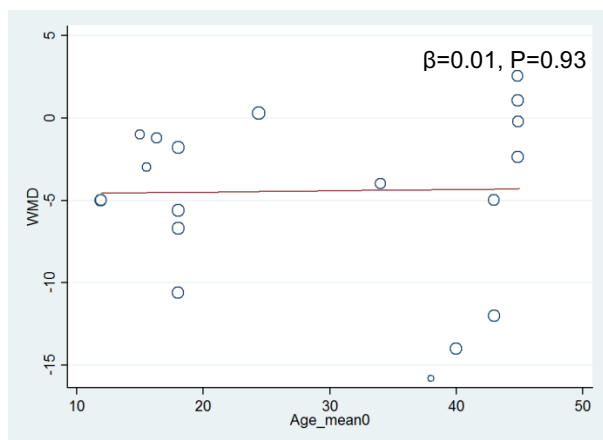

## ONLINE SUPPLEMENTARY MATERIAL

### **Overweight, obesity, and lung function in children and adults – a meta-analysis**

Erick Forno<sup>1\*</sup>, Yueh-Ying Han<sup>1\*</sup>, James Mullen<sup>2</sup>, Juan C. Celedón<sup>1</sup>

*<sup>1</sup>Division of Pulmonary Medicine, Allergy and Immunology, Department of Pediatrics, Children's Hospital of Pittsburgh of UPMC, University of Pittsburgh, Pittsburgh, PA; <sup>2</sup>College of Science, University of Notre Dame, Notre Dame, IN. \*These authors contributed equally to the manuscript.*

\*These authors contributed equally to this work.

Corresponding author: Erick Forno, M.D., M.P.H.  
Division of Pulmonary Medicine, Allergy and Immunology  
Children's Hospital of Pittsburgh of UPMC  
4401 Penn Avenue, Pittsburgh, PA 15224  
Phone: 412.692.8429; Fax 412.692.7636  
Email: [erick.forno@chp.edu](mailto:erick.forno@chp.edu)

**Funding:** Dr. Forno's contribution was supported by NIH grant HL125666 and by a grant from Children's Hospital of Pittsburgh of UPMC. Dr. Celedón's contribution was supported by NIH grants HL079966, HL117191 and HL119952, and by an endowment from the Heinz Foundation.

**Supplementary Table E1 – Spirometric values by age, asthma, and obesity status**

| <b>Adults</b>             | <b>Control<br/>Normal weight</b> | <b>Control<br/>Overweight/obese</b> | <b>Asthma<br/>Normal weight</b> | <b>Asthma<br/>Overweight/obese</b> |
|---------------------------|----------------------------------|-------------------------------------|---------------------------------|------------------------------------|
| FEV <sub>1</sub> (%pred)  | 105.03 ± 6.64                    | 97.34 ± 6.30                        | 85.36 ± 16.04                   | 82.62 ± 15.61                      |
| FVC (%pred)               | 106.27 ± 9.12                    | 96.83 ± 4.34                        | 97.47 ± 7.44                    | 94.07 ± 8.44                       |
| FEV <sub>1</sub> /FVC (%) | 83.98 ± 4.60                     | 83.26 ± 3.64                        | 73.88 ± 7.26                    | 72.86 ± 7.57                       |

| <b>Children</b>           | <b>Control<br/>Normal weight</b> | <b>Control<br/>Overweight/obese</b> | <b>Asthma<br/>Normal weight</b> | <b>Asthma<br/>Overweight/obese</b> |
|---------------------------|----------------------------------|-------------------------------------|---------------------------------|------------------------------------|
| FEV <sub>1</sub> (%pred)  | 100.23 ± 5.16                    | 99.35 ± 6.97                        | 91.07 ± 4.77                    | 91.94 ± 4.64                       |
| FVC (%pred)               | 102.04 ± 3.43                    | 105.04 ± 12.13                      | 99.71 ± 4.23                    | 100.25 ± 5.42                      |
| FEV <sub>1</sub> /FVC (%) | 92.27 ± 3.71                     | 89.02 ± 4.68                        | 85.20 ± 6.34                    | 83.32 ± 5.79                       |

Tables show the mean (±SD) reported FEV<sub>1</sub>, FVC, and FEV<sub>1</sub>/FVC for all studies included in the corresponding analyses.

## **SUPPLEMENTAL FIGURES – TITLES AND LEGENDS**

### **Supplemental Figure E1 – Obesity and FEV<sub>1</sub> (%pred) by asthma status.**

WMD: Weighted mean difference. OV=overweight, OB=obese, OVOB=overweight or obese.

### **Supplemental Figure E2 – Obesity and FEV<sub>1</sub> (liters) by age group.**

WMD: Weighted mean difference. OV=overweight, OB=obese, OVOB=overweight or obese.

### **Supplemental Figure E3 – Obesity and FVC (%pred) by weight group.**

WMD: Weighted mean difference. OV=overweight, OB=obese, OVOB=overweight or obese.

### **Supplemental Figure E4 – Obesity and FEF<sub>25-75</sub> (%pred) by age group.**

WMD: Weighted mean difference. OV=overweight, OB=obese, OVOB=overweight or obese.

### **Supplemental Figure E5 – Obesity and TLC (%pred) by asthma status.**

WMD: Weighted mean difference. OV=overweight, OB=obese, OVOB=overweight or obese.

### **Supplemental Figure E6 – Obesity and TLC (%pred) by weight group.**

WMD: Weighted mean difference. OV=overweight, OB=obese, OVOB=overweight or obese.

### **Supplemental Figure E7 – Obesity and FRC (%pred) by weight group.**

WMD: Weighted mean difference. OV=overweight, OB=obese.

### **Supplemental Figure E8 – Funnel plots and Egger's test for small-study effects.**

### **Supplemental Figure E9 – Effect modification of obesity on lung function by age and gender.**
